# Supplementary material for: Epigenome-Wide Association Study in Asian Cohort Identifies Novel DNA Methylation Markers for Carotid Intima-Media Thickness
Source: Research Square preprint supplement (doi:10.21203/rs.3.rs-9046066/v1), 2026-03-16
Supplement: Supplementary file 1 [file 5584abd82c1dc3d923efaf19.docx]

This supplementary appendix (‘Additional File 3’) provides extended cohort and methodological information accompanying the following manuscript:

**Title:** **Epigenome-Wide Association Study in Asian Cohort Identifies Novel DNA Methylation Markers for Carotid Intima-Media Thickness**

**Journal:** Clinical Epigenetics

**Authors:** Konstanze Tan, Sarah E Harris, Jane Maddock, Darwin Tay, Pritesh R Jain, The HELIOS Study Team, Shi Qi Mok, Maxime Herbrard, Ulf Schminke, Can Can Xue, Liuh Ling Goh, Theresia Mina, Alexander Teumer, Weng Khong Lim, Khai Pang Leong, Khung Keong Yeo, Ching-Yu Cheng, Xueling Sim, Lee Eng Sing, Joanna M Wardlaw, Henry Völzke, Andrew Wong, Simon R Cox, Rinkoo Dalan, Abbas Dehghan, Marie Loh

**Corresponding Author:** Marie Loh

**Affiliation:** Lee Kong Chian School of Medicine, Nanyang Technological University Singapore, Singapore

**Email:** [marie_loh@ntu.edu.sg](mailto:marie_loh@ntu.edu.sg)

***Extended cohort descriptions***

***Examining concordance between self-reported and genetic ancestry (HELIOS)***

Self-reported ethnicity, used for ethnic-specific analyses in this study, showed high concordance with genetically determined ancestry, both in the current investigated cohort and in previous research on the Singapore population.(1) To verify concordance in this investigation, genetic principal components were calculated and k-means clustering performed based on the top five PCs to identify the three major ethnic groups. Concordance was calculated as the proportion of participants whose self-reported ethnicity matched their genetic cluster, yielding high agreement rates (Chinese: 99.1%, Malay: 82.6%, Indian: 96.9%).

***Cohort descriptions (European cohorts)***

This section describes the three European cohorts contributing to the trans-ancestry cIMT EWAS. European cohort data were obtained from two sources: (1) pre-existing summary statistics generated from the previous published meta-analysis of cIMT (Study of Health in Pomerania [SHIP]; MRC National Survey of Health and Development [NSHD], provided by the corresponding author with permission from respective study teams, or (2) custom analysis conducted for this investigation (Lothian Birth Cohort 1936 [LBC]).

***Lothian Birth Cohorts (LBCs)***

The Lothian Birth Cohorts (LBCs) consist of Scotland-based longitudinal studies of older adults designed to understand cognitive ageing. The dataset used in this investigation comes from the 1936 longitudinal study (LBC1936) of individuals who participated in the Scottish Mental Survey of 1947, where almost all Scottish schoolchildren born in 1936 completed a cognitive ability test at age 11.(2)

A total of 1,091 community-dwelling individuals took part in the first wave of the LBC1936 study between 2004 and 2007, when they were about 70 years old. The first wave included comprehensive physical, medical, and cognitive evaluations. The second wave of the study took place between 2007 and 2010, where participants, now aged about 73 years, underwent extended tests including carotid artery Doppler ultrasound scanning of cIMT. The cIMT EWAS was conducted specifically by the LBC research team for this investigation, using array-based DNA methylation data (Illumina Infinium HumanMethylation450 BeadChip (450K array)) from blood samples collected during the second wave to maintain temporal alignment with cIMT measurements.

*cIMT measurement*

Bilateral cIMT measurements were obtained in segment spanning the CCA and carotid bulb using the Siemens Antares Premium Colour Doppler scanner with a 7.5 MHz variable frequency probe, as previously described.(3) Manual measurements were obtained using electronic calipers in the Framingham Heart Study IMT software available on the ultrasound scanner. This software takes measures a 1 cm long segment of the CCA and carotid bulb three times, then reports minimum, mean and maximum cIMT as an average of the multiple measurements taken. cIMTmean was calculated by averaging the maximum values obtained from the left and right carotid arteries

***Study of Health in Pomerania (SHIP)***

The Study of Health in Pomerania (SHIP) is a longitudinal population-based cohort study based in Western Pomerania, designed to examine common risk factors for disease in the adult population of Northeast Germany. The SHIP-TREND cohort comprised 4,420 participants aged 20-81 years who underwent baseline examinations between 2008 and 2012. (4) The cIMT EWAS utilised array-based DNA methylation data (EPIC array) obtained from blood samples collected during baseline examinations. This investigation utilises pre-existing cIMT EWAS summary statistics from this cohort that were originally generated for a published meta-analysis of cIMT methylation associations in European cohorts.(5) These data were provided upon request from the corresponding author with permission from the SHIP study team.

*cIMT measurement*

Bilateral cIMT measurements were obtained in the distal straight portion of the far-wall of the CCA using B-mode ultrasound with an operating frequency of 13 MHz, as previously described.(5, 6) Measurements were obtained proximal to the carotid bifurcation using a semi-automated edge-tracking software. The software performs 250 measurements of a 10mm segment of the CCA and reports the mean and maximum values of all measurements. cIMTmean was calculated by averaging the maximum values obtained from the left and right carotid arteries.

***MRC National Survey of Health and Development (NSHD)***

The Medical Research Council National Survey of Health and Development (NSHD) cohort is a longitudinal study that has followed individuals born in England, Scotland, and Wales during one week in March 1946.(7, 8, 9) This cohort has been followed up twenty-four times since birth. At the 23rd follow-up, when participants were 60-64 years old, a total of 2229 participants completed a clinical assessment or home visitation by a nurse. Of these, 1690 attended a clinic where vascular measurements were conducted. DNA methylation profiling was performed on blood samples collected at two time points: when participants were 53 years old (n=1376) and 60-64 years old (n=694). The cIMT EWAS utilised array-based DNA methylation data (EPIC array) from the 60–64-year time point to maintain temporal alignment with cIMT measurements. This investigation utilises pre-existing cIMT EWAS summary statistics from this cohort that were originally generated for a published meta-analysis of cIMT methylation associations in European cohorts.(5) These data were provided upon request from the corresponding author with permission from the NSHD study team.

*cIMT measurement*

Bilateral cIMT measurements were obtained in the proximal and far walls of the CCA using the GE Vivid I ultrasound scanner equipped with a 12MHz probe, as previously described.(10) Manual measurements were performed proximal to the carotid bifurcation, where a human operator selects three end-diastolic dataframes from each lateral view. Subsequently, the mean of the six measurements (three frames per side) was determined. cIMTmean was calculated by averaging the measurements from the left and right carotid arteries.

***Identification of healthy HELIOS subset for sensitivity analysis***

We identified a healthy subset of 837 participants (717 Chinese, 60 Malay, 60 Indian) from the total cohort of 1,357 individuals. Participants were excluded if they had a known diagnosis of, or were on medication for, cardiovascular disease, diabetes, hypertension, or hyperlipidemia, as previously described.(11) Additional exclusion criteria were the presence of metabolic syndrome, defined as having three or more of the following;

- Waist circumference >80 cm (females) or >90 cm (males)
- Triglycerides ≥150 mg/dL (1.7 mmol/L)
- HDL-C <40 mg/dL (1.0 mmol/L) in males or <50 mg/dL (1.3 mmol/L) in females
- Systolic BP ≥130 mm Hg and/or diastolic BP ≥85 mm Hg
- HbA1c ≥5.7%

Participants with average cIMT values >3 standard deviations above the mean were also excluded to minimize the influence of outliers.

***Extended Methods***

***Whole genome sequencing (SG10K_Health; HELIOS)***

WGS was performed for SG10K_Health participants using Illumina Hiseq X platform achieving an average depth of 15.8X per sample, as previously described.(1) Following sequencing, pre-imputation QC and imputation of unmeasured genotypes were carried out, as described in Yew *et al.*(12) Genotype imputation was performed for 9,766 participants using the TopMed Imputation Server against the TopMed (Version R2) reference panel. The server’s standard workflow employed EAGLE2 for haplotype phasing followed by Minimac4 for imputation. This imputation process yielded approximately 285 million autosomal SNPs. Post-imputation QC implemented the following filters: (i) MAF <0.001 in at least one of the three ethnicities (Chinese, Malays and Indians), (ii) imputation INFO score <0.30, and (iii) RUTH Hardy-Weinberg Equilibrium test P <1E-03.(13) Applying this filtering strategy yielded a total of 7,857,631 high-quality imputed autosomal SNPs for downstream analysis.

***RNA sequencing (HELIOS)***

RNA sequencing was performed on whole blood samples from HELIOS participants (n=1,234) at enrolment. RNA-seq libraries were prepared using NEBNext Ultra II Directional RNA Library Prep (New England Biolabs, Inc.), requiring as little as 1 μg of total RNA. To optimize sequencing depth for biologically meaningful RNAs, depletion of dominant RNA species including globin gene RNA and ribosomal RNA was performed using GLOBINClear (Thermo Fisher Scientific). The prepared libraries were then sequenced on a NovaSeq6000 using paired-end 2x150bp reads, targeting a sequencing depth of at least 30 million aligned reads per library (~9Gb of data). Following sequencing, adapter and quality trimming were performed using TrimGalore, whereas SortMeRNA was used for additional rRNA removal.(14, 15) The reads were aligned to the GRCh38 reference genome using STAR (version 2.7.9a), and gene expression was quantified using RSEM (version 1.3.3), which initially identified 60,708 genes. A gender mismatch check was then performed using expression levels of gender-specific genes (*XIST, RPS4Y1, EIF1AY, DDX3Y, and KDM5D*). To retain reliably expressed genes, genes with transcript per million (TPM) ≥1 and read count ≥6 in at least 20% of the samples were retained, yielding a final set of 12,434 genes for downstream analysis. Finally, to account for library size and RNA composition biases, gene expression values were normalised using the Trimmed Mean of M-values (TMM) approach.(16)

**References**

1. Chan SH, Bylstra Y, Teo JX, Kuan JL, Bertin N, Gonzalez-Porta M, et al. Analysis of clinically relevant variants from ancestrally diverse Asian genomes. Nat Commun. 2022;13(1):6694.

2. Taylor AM, Pattie A, Deary IJ. Cohort Profile Update: The Lothian Birth Cohorts of 1921 and 1936. Int J Epidemiol. 2018;47(4):1042-r.

3. Wardlaw JM, Bastin ME, Valdes Hernandez MC, Maniega SM, Royle NA, Morris Z, et al. Brain aging, cognition in youth and old age and vascular disease in the Lothian Birth Cohort 1936: rationale, design and methodology of the imaging protocol. Int J Stroke. 2011;6(6):547-59.

4. Volzke H, Schossow J, Schmidt CO, Jurgens C, Richter A, Werner A, et al. Cohort Profile Update: The Study of Health in Pomerania (SHIP). Int J Epidemiol. 2022;51(6):e372-e83.

5. Portilla-Fernandez E, Hwang SJ, Wilson R, Maddock J, Hill WD, Teumer A, et al. Meta-analysis of epigenome-wide association studies of carotid intima-media thickness. Eur J Epidemiol. 2021;36(11):1143-55.

6. Volzke H, Alte D, Schmidt CO, Radke D, Lorbeer R, Friedrich N, et al. Cohort profile: the study of health in Pomerania. Int J Epidemiol. 2011;40(2):294-307.

7. Wadsworth M, Kuh D, Richards M, Hardy R. Cohort Profile: The 1946 National Birth Cohort (MRC National Survey of Health and Development). Int J Epidemiol. 2006;35(1):49-54.

8. Kuh D, Pierce M, Adams J, Deanfield J, Ekelund U, Friberg P, et al. Cohort profile: updating the cohort profile for the MRC National Survey of Health and Development: a new clinic-based data collection for ageing research. Int J Epidemiol. 2011;40(1):e1-9.

9. Stafford M, Black S, Shah I, Hardy R, Pierce M, Richards M, et al. Using a birth cohort to study ageing: representativeness and response rates in the National Survey of Health and Development. Eur J Ageing. 2013;10(2):145-57.

10. Britton A, Hardy R, Kuh D, Deanfield J, Charakida M, Bell S. Twenty-year trajectories of alcohol consumption during midlife and atherosclerotic thickening in early old age: findings from two British population cohort studies. BMC Med. 2016;14(1):111.

11. Dalan R. Carotid atherosclerosis : an ultrasonographic window for subclinical atherosclerotic cardiovascular disease. Nanyang Technological University: Nanyang Technological University; 2024.

12. Yew YW, Mina T, Ng HK, Lam BCC, Riboli E, Lee ES, et al. Investigating causal relationships between obesity and skin barrier function in a multi-ethnic Asian general population cohort. Int J Obes (Lond). 2023;47(10):963-9.

13. Kwong AM, Blackwell TW, LeFaive J, de Andrade M, Barnard J, Barnes KC, et al. Robust, flexible, and scalable tests for Hardy-Weinberg equilibrium across diverse ancestries. Genetics. 2021;218(1).

14. Krueger F. [Available from: <https://github.com/FelixKrueger/TrimGalore>.

15. Kopylova E, Noe L, Touzet H. SortMeRNA: fast and accurate filtering of ribosomal RNAs in metatranscriptomic data. Bioinformatics. 2012;28(24):3211-7.

16. Yang J, Wang D, Yang Y, Yang W, Jin W, Niu X, et al. A systematic comparison of normalization methods for eQTL analysis. Brief Bioinform. 2021;22(6).
