# Supplementary material for: Epigenome-Wide Association Study in Asian Cohort Identifies Novel DNA Methylation Markers for Carotid Intima-Media Thickness
Source: Research Square preprint supplement (doi:10.21203/rs.3.rs-9046066/v1), 2026-03-16
Supplement: Supplementary file 3 [file f881f2e2512b9ffedfdf01d9.xlsx]

## Sheet: Details and overview
	Title: Epigenome-Wide Association Study in Asian Cohort Identifies Novel DNA Methylation Markers for Carotid Intima-Media Thickness
	Journal: Clinical Epigenetics
	Authors: Konstanze Tan, Sarah E Harris, Jane Maddock, Darwin Tay, Pritesh R Jain, The HELIOS Study Team, Shi Qi Mok, Maxime Herbrard, Ulf Schminke, Can Can Xue, Liuh Ling Goh, Theresia Mina, Alexander Teumer, Weng Khong Lim, Khai Pang Leong, Khung Keong Yeo, Ching-Yu Cheng, Xueling Sim, Lee Eng Sing, Joanna M Wardlaw, Henry Völzke, Andrew Wong, Simon R Cox, Rinkoo Dalan, Abbas Dehghan, Marie Loh
	Corresponding Author: Marie Loh
	Affiliation: Lee Kong Chian School of Medicine, Nanyang Technological University Singapore, Singapore
	Email: marie_loh@ntu.edu.sg
	What this appendix provides: Cohort characteristics, extended data from core analyses, and sensitivity analysis results.
	Table of Content Supplementary Tables
	Table S1. Characteristics of the HELIOS cohort participants by ethnic group (Chinese, Malay, Indian) in the discovery cIMT EWAS
	Table S2. Characteristics of participants contributing to meQTL, eQTL and eQTM analyses
	Table S3. Sensitivity analyses with genetic principal components
	Table S4. Sensitivity analysis in a healthy population subset
	Table S5. EWAS catalog associations for sentinel CpG sites
	Table S6. GWAS catalog associations for proximal genes to sentinel CpG sites
	Table S7. Transcription factor binding site overrepresentation (permutation P≤0.005) amongst cIMT-linked CpGs
	Table S8. SMR and colocalisation results for cg08227773-CAD
	Table S9. SMR and colocalisation results for sentinel CpG–gene pairs with evidence for shared regional genetic architecture (SMR P<0.05; coloc PP.H3 or P.H4 >0.5).
	Table S10. Receiver Operating Characteristic (ROC) analysis for MRS of cIMT

## Sheet: S1
Supplementary Table 1: Characteristics of the HELIOS cohort participants by ethnic group (Chinese, Malay, Indian) in the discovery cIMT EWAS
	Characteristic	HELIOS Chinese	HELIOS Malay	HELIOS Indian
		N=1063	N=150	N=144
	Female (%)	652 (61.3%)	80 (53.3%)	74 (51.4%)
	Age (years; mean ± SD)	53.7 ± 11.2	56.8 ± 10.1	51.4 ± 11.6
	cIMTmean (mm; mean ± SD)	0.63 ± 0.13	0.68 ± 0.15	0.63 ± 0.14
	cIMTmax (mm; mean ± SD)	0.69 ± 0.16	0.75 ± 0.18	0.70 ± 0.18
	log(cIMTmean) (mean ± SD)	-0.49 ± 0.20	-0.40 ± 0.22	-0.48 ± 0.21
	log(cIMTmax) (mean ± SD)	-0.40 ± 0.22	-0.32 ± 0.24	-0.39 ± 0.24
	BMI (kg/m^2; mean ± SD)	23.4 ± 3.7	27.6 ± 4.8	26.8 ± 4.1
	SBP (mmHg; mean ± SD)	119.7 ± 17.7	122.5 ± 19.4	118.1 ± 17.0
	DBP (mmHg; mean ± SD)	76.6 ± 10.4	78.9 ± 10.8	77.8 ± 10.6
	HDL cholesterol (mmol/L; mean ± SD)	1.6 ± 0.4	1.4 ± 0.4	1.3 ± 0.3
	Smoking: Current (%)	42 (4.0%)	19 (12.7%)	16 (11.1%)
	Smoking: Former (%)	84 (7.9%)	31 (20.7%)	11 (7.6%)
	Smoking: Never (%)	924 (86.9%)	100 (66.7%)	115 (79.9%)

## Sheet: S2
Supplementary Table 2: Characteristics of participants contributing to meQTL, eQTL and eQTM analyses
meQTL are derived from meta-analysis of four adult cohorts within the SG10K_Health study (N = 5,273): MEC, PRISM, SEED and TTSH to identify genetic instruments for causal inference analyses. The ‘MEC-donated’ cohort represents samples from the MEC cohort that were processed separately and therefore analysed independently in meta-analysis. eQTL and eQTM data generated from the HELIOS cohort were u…
	meQTL (SG10K_Health)					eQTL N=1168	eQTM N=1201
	MEC	MEC_donated	PRISM	SEED	TTSH	HELIOS	HELIOS
Female	863 (55.6%)	614 (58.1%)	530 (50.4%)	565 (55.5%)	487 (81.7%)	711 (60.9%)	727 (60.5%)
Age, years	44.5	50.4	46	52.2	40.2	53.3	53.6
mean±SD	± 11.5	± 11.3	± 13.6	± 7.5	± 10.7	± 11.6	± 11.7
Ethnicity
Chinese	537 (34.6%)	358 (33.9%)	925 (87.9%)	447 (43.9%)	318 (53.4%)	850 (72.8%)	867 (72.2%)
Malay	528 (34.0%)	350 (33.1%)	67 (6.4%)	146 (14.3%)	125 (21.0%)	157 (13.4%)	124 (10.3%)
Indian	485 (31.3%)	348 (33.0%)	58 (5.5%)	425 (41.7%)	153 (25.7%)	158 (13.5%)	151 (12.6%)
Other	1 (0.1%)	0 (0.0%)	2 (0.2%)	0 (0.0%)	0 (0.0%)	3 (0.3%)	59 (4.9%)

## Sheet: S3
Supplementary Table 3: Sensitivity analyses with genetic principal components
	MarkerName	Zscore	P.value	Direction	HetISq	HetChiSq	HetDf	HetPVal	bonf_sig
	cg08227773	-3.775	0.0001598	-+-	0	1.956	2	0.3761	Y
	cg14978069	3.097	0.001955	+++	0	1.036	2	0.5958	Y
	cg10556813	4.716	2.401e-06	+++	64.8	5.675	2	0.05858	Y
	adj = results from regression models adjusting for 5 genetic PCs in ethnic-specific analyses (lncIMTmean ~CpG + Age + Sex + Smoking + white blood cell proportions + PC1-30control-probes + PC1-5genetic)

## Sheet: S4
Supplementary Table 4: Sensitivity analysis in a healthy population subset (n=837)
	MarkerName	Zscore	P.value	Direction (CHN-MLY-IND)	HetISq	HetChiSq	HetDf	HetPVal
	cg08227773	-2.604	0.009219	---	0	0.384	2	0.8254
	cg14978069	1.427	0.1535	+-+	0	0.868	2	0.6478
	cg10556813	3.612	0.0003036	++-	47.6	3.818	2	0.1482
	results from regression models adjusting for 5 genetic PCs in ethnic-specific analyses (lncIMTmean ~ CpG + Age + Sex + smoking + white blood cell proportions + PC1-30control-probes)

## Sheet: S5
Supplementary Table 5: EWAS catalog associations for sentinel CpG sites
	Sentinel	EWAS catalog associations
	cg08227773	Robert-F-Hillary_Incident_COPD_Basic_model
	cg10556813	None
	cg14978069	Robert-F.-Hillary_c-reactive_protein__crp__levels_basic_model, Robert-F-Hillary_Incident_COPD_Basic_model, Robert-F-Hillary_Prevalent_Chronic_Pain_(Self-report)_Basic_model

## Sheet: S6
Supplementary Table 6: GWAS catalog associations for proximal genes to sentinel CpG sites
	Sentinel	nearest_gene	nearest_gene_traits_all	nearest_gene_traits_cvd_cardiometabolic	lead_eQTM_gene	lead_eQTM_gene_traits_all	lead_eQTM_gene_traits_cvd_cardiometabolic
	cg08227773	CCDC12	body height, lymphocyte count, leukocyte quantity, platelet-to-lymphocyte ratio, macrophage inflammatory protein 1b measurement, neutrophil-to-lymphocyte ratio, DNA repair protein RAD51 homolog 4 measurement, sex hormone-binding globulin measurement, smoking initiation, BMI-adjusted waist-hip ratio, platelet volume, monocyte count, CCL4 measurement, waist-hip ratio, educational attainment, neutro…	Adiposity measures, inflammatory markers, haematological measures.	DHX30	urate measurement	endothelial dysfunction marker
	cg10556813	KIF3A	cystatin C measurement, childhood onset asthma, eosinophil count, Eczematoid dermatitis, atopic asthma, atopic eczema, asthma, body height, eosinophil percentage of leukocytes, allergic disease, allergic disease, age at onset, asthma, allergic disease, Abnormality of refraction, mosquito bite reaction itch intensity measurement, mosquito bite reaction size measurement, atopic eczema, childhood on…	inflammatory markers, respiratory and atopic conditions	SLC22A5	body height, platelet volume, tryptophan betaine measurement, leukocyte quantity, carnitine measurement, isovalerylcarnitine (C5) measurement, dihomo-linolenoylcarnitine (C20:3n3 or 6) measurement, monocyte count, N,N,N-trimethyl-5-aminovalerate measurement, propionylcarnitine measurement, homostachydrine measurement, ergothioneine measurement, myristoylcarnitine (C14) measurement, metabolite mea…	blood pressure, lipid profile
	cg14978069	SCLT1	self reported educational attainment, beverage consumption measurement, chronic obstructive pulmonary disease, cytokine measurement, R-warfarin measurement, color vision disorder	COPD, cytokine measurement	JADE1	educational attainment, mathematical ability, alcohol consumption quality, trait in response to hydrochlorothiazide, obsolete_fasting blood glucose measurement	metabolic risk factors

## Sheet: S7
Supplementary Table 7: Transcription factor binding site overrepresentation (permutation P≤0.005) amongst cIMT-linked CpGs
		TF	test	bg_mean	fold_change	Vascular role	PMID	Blood role	PMID
	1	MEF2C	25	11.88	2.10438	sprouting angiogenesis; vascular homeostasis	27898394	pro-inflammatory Th1 response	35194174
	2	ZNF764	26	14.03	1.85317
	3	NFKB2	34	18.82	1.80659	sprouting angiogenesis; vascular homeostasis	29407886	central mediator of inflammation	30778349
	4	MEIS1	54	30.25	1.78512	reguator of endothelial cell/vascular development; heart development	18656453
	5	RUNX1-RUNX1T1	45	25.415	1.77061
	6	STAT5A	72	43.285	1.66339
	7	BCLAF1	33	20.37	1.62003	angiogenesis	30367150
	8	TBX21	232	167.27	1.38698
	9	IKZF2	163	119.01	1.36963
	10	MBD1	83	60.995	1.36077
	11	SKIL	198	146.725	1.34946
	12	ZBTB12	84	63.49	1.32304
	13	PBX1	131	99.905	1.31125	angiogenesis	16328158	suppression of inflammation	18093541
	14	BACH1	164	125.33	1.30855
	15	ARID5B	89	68.045	1.30796
	16	FOXM1	153	117.55	1.30157	endothelial proflieration after vascular injury	16955137
	17	STAT5B	111	86.145	1.28853
	18	PBX3	105	81.76	1.28425
	19	NR2F1	228	178.335	1.27849
	20	MEF2B	162	127.615	1.26944
	21	TAL1	224	176.935	1.266	endothelial development; vascular specification; angiogensis	14970264	proliferation/differentiation of bone-marrow monocyte precursors	20194619
	22	NFATC3	228	180.11	1.26589			innate immune response of macrophages	21726630
	23	BCL6	307	245.355	1.25125			anti-inflammation in macrophages	23041630
	24	NFIC	232	185.58	1.25013
	25	ZNF207	139	111.25	1.24944
	26	MYB	288	231.485	1.24414
	27	DNMT3B	236	190.08	1.24158
	28	RUNX2	169	136.36	1.23937	vascular remodeling	33842584	chemotaxis	33555272
	29	ZNF687	162	131.605	1.23096
	30	GATAD2B	205	166.88	1.22843
	31	RELB	220	179.915	1.2228
	32	LMO1	134	110.115	1.21691
	33	CEBPA	255	209.895	1.21489
	34	MTA2	352	290.365	1.21227
	35	PAF1	155	127.97	1.21122
	36	KMT2B-D	153	126.325	1.21116	angiogenesis	36594087, 36947365
	37	MAF	236	195.025	1.2101
	38	HDGF	172	142.14	1.21007	neointima formation via VSMC proliferation and migration	16641209
	39	MED1	645	534.44	1.20687
	40	KMT2A	485	402.005	1.20645
	41	TARDBP	303	252.25	1.20119
	42	IRF4	281	234.7	1.19727	protective in vascular injury: limits neointima, anti-proliferation	28851732	disrupts macrophage-VSMC crosstalk	40126336
	43	CDK9	308	257.275	1.19716
	44	TRIM22	209	174.585	1.19712
	45	FOXO1	205	171.245	1.19712	vascular development; endothelial quiescence	19747349	pro-inflammatory gene expression in macrophages; T cell homing	21045807
	46	ZBTB33	264	220.59	1.19679
	47	ZNF3	195	162.965	1.19658
	48	ATF7	297	248.685	1.19428
	49	RBFOX2	212	178.67	1.18655
	50	ARID1A	430	363.255	1.18374
	51	NOTCH1	201	169.88	1.18319	arterial identity; sprouting angiogenesis; vascular inflammation	33681228	macrophage polarization	22610140
	52	JUNB	314	266.815	1.17685	endothelial sprouting/migration; angiogenesis; vascular development	33802099	macrophage activation	25472994
	53	MLLT1	311	265.765	1.17021
	54	SMARCB1	435	373.57	1.16444
	55	DPF2	325	279.67	1.16208
	56	HNF4A	272	234.27	1.16105
	57	PAX5	252	217.465	1.15881
	58	SUPT5H	324	281.69	1.1502
	59	BRD3	324	282.93	1.14516	VSMC proliferation and neointima formation	32353113
	60	BHLHE40	285	249.68	1.14146	regulates pulmonary arterial endothelial proliferation/apoptosis	34765605	inflammation	29773644
	61	RUNX1	468	416.465	1.12374
	62	BRD4	875	779.43	1.12262	endothelial and SMC inflammation; SMC proliferation; intimal hyperplasia; neointima formation	32353113	inflammatory gene expression in myeloid cells	32324495
	63	AR	571	510.1	1.11939

## Sheet: S8
Supplementary Table 8: SMR and colocalisation results for cg08227773-CAD
	CpG	snp	outcome	beta_meqtl	p_meqtl	beta_gwas	p_gwas	beta_SMR	p_smr	PP.H3.abf	PP.H4.abf	nsnps_coloc
	cg08227773	chr3:46971962:A:T	CAD	-0.0035	2.79e-57	-0.041819	1.66713e-05	11.9483	2.90614e-05	0.069648	0.914135	3154

## Sheet: S9
Supplementary Table 9: SMR and colocalisation results for sentinel CpG–gene pairs with evidence for shared regional genetic architecture (SMR P<0.05; coloc PP.H3 or P.H4 >0.5).
		cpg	snp	outcome	beta_meqtl	p_meqtl	beta_eqtl	p_eqtl	F-statistic	beta_SMR	p_smr	eqtm_beta	eqtm_p	PP.H3.abf	PP.H4.abf	nsnps_coloc	smr_arterial_sig	Function
		cg08227773	chr3:46971962:A:T	NBEAL2	-0.0035	2.79e-57	-0.0721979	2.51676e-08	306.25	20.63	9.13e-08	0.56	0.166	0.309289	0.690698	3217	aorta,coronary,tibial	Platelet dysfunction; may influence thrombosis
		cg14978069	chr4:128916591:A:G	LARP1B	-0.0112	3.811e-20	-0.0468939	0.00629462	87.11	4.19	0.00863	-0.06	0.62	0.501348	0.148494	2740		mRNA metabolism and translation; possible role in insulin resistance
		cg08227773	rs4682844	SETD2	0.0034	5.99e-55	-0.0201785	0.0451552	306.25	-5.93	0.0464	0.64	0.0352	0.542398	0.0499978	3118	aorta,coronary,tibial	Histone methyltransferase, coronary vascular formation
		cg14978069	rs318526	SCLT1	-0.0045	2.415e-17	0.0292357	0.000762962	87.11	-6.5	0.00158	-0.19	0.221	0.95564	0.0303044	4981	aorta,coronary,tibial	Formation and function of cilia(166)
		cg08227773	chr3:46971962:A:T	ALS2CL	-0.0035	2.79e-57	-0.0250963	0.0373824	289	7.17	0.0385	0.18	0.628	0.96327	0.00570709	3082	aorta,coronary,tibial	Poorly characterised; possible regulation of endosomal pathways
		cg14978069	rs10002332	PGRMC2	-0.004	4.699e-11	-0.0147895	0.0324065	87.11	3.7	0.0414	0.15	0.133	0.988616	0.000806091	2945		Binds progesterone; cardiac contractility and function
		cg14978069	rs318526	JADE1	-0.0045	2.415e-17	0.0414807	8.31878e-08	81	-9.22	3.71e-06	-0.26	0.0482	0.999895	0.000105427	4814	aorta,tibial	Chromatin remodeling and cell cycle regulation
		cg08227773	rs141040281	CCR2	0.0029	4.089e-34	0.0251117	0.0380692	306.25	8.66	0.0398	-0.24	0.498	0.999282	2.26437e-05	2806	coronary,tibial	Chemokine receptor; regulates monocyte trafficking
		cg08227773	rs4858890	CCRL2	0.0032	4.367e-47	0.0223721	0.0444853	306.25	6.99	0.0459	0.64	0.0687	0.999761	9.98182e-06	2845	aorta,tibial	Atypical chemokine receptor; atherosclerotic plaque formation
		cg08227773	chr3:46919252:A:G	CXCR6	-0.0027	2.86e-33	0.0369074	0.0391583	306.25	-13.67	0.0412	-0.4	0.467	0.999991	4.71005e-07	2456	coronary,tibial	Chemokine receptor; lymphocyte homing
		cg14978069	chr4:128916591:A:G	C4orf33	-0.0112	3.811e-20	0.144491	7.72686e-05	44.44	-12.9	0.000261	-0.23	0.348	1	4.41331e-07	4763	aorta,coronary,tibial	Not known
		cg08227773	chr3:46971962:A:T	SCAP	-0.0035	2.79e-57	-0.0834854	7.37383e-20	306.25	23.85	2.28e-16	0.21	0.462	1	3.79064e-08	2076	aorta,coronary,tibial	Regulates cholesterol homeostasis; key in lipid metabolism and atherosclerosis
		cg08227773	rs13063578	CCR5	-0.002	1.802e-16	0.0304082	0.0398315	306.25	-15.2	0.0438	-1.33	0.00172	1	3.63335e-09	2815	coronary,tibial	Chemokine receptor; lymphocyte homing
		cg08227773	chr3:46971962:A:T	MAP4	-0.0035	2.79e-57	0.0290102	0.00351024	210.25	-8.29	0.00391	-0.38	0.223	1	1.0456e-16	914	aorta,coronary,tibial	Microtubule stabilisation; cardiac hypertrophy
		cg08227773	chr3:46854204:T:C	CCR1	0.0015	3.461e-07	-0.062194	0.0202165	210.25	-41.46	0.035	2.4	9.65e-05	1	2.43931e-20	2703	aorta,coronary,tibial	Chemokine receptor; T cell infiltration
		cg08227773	chr3:46971962:A:T	KLHL18	-0.0035	2.79e-57	-0.27709	1.63603e-50	210.25	79.17	1.45e-31	-1.28	0.0322	1	1.18065e-22	2413	coronary,tibial	Tumor suppressor
		cg08227773	chr3:46860639:T:G	CCR3	0.0019	2.863e-16	-0.0483894	0.0311235	210.25	-25.47	0.0353	-0.42	0.538	1	4.25381e-64	2747		Chemokine receptor; inflammatory cell recruitment and activation

[truncated: 1 more sheets: S10]
